# Supplementary material for: Effects of linagliptin vs glimepiride on cognitive performance in type 2 diabetes: results of the randomised double-blind, active-controlled CAROLINA-COGNITION study
Source: PubMed Central journal article supplement (PMC8099814; doi:10.1007/s00125-021-05393-8), 2021-02-09
Supplement: 125_2021_5393_MOESM1_ESM.pdf [file 125_2021_5393_MOESM1_ESM.pdf]

## Electronic supplementary material (ESM)

Biessels GJ, Verhagen C, Janssen J, van den Berg E, Wallenstein G, Zinman B, Espeland MA, Johansen OE. Effects of linagliptin versus glimepiride on cognitive performance in type 2 diabetes: results of the randomised double-blind, active-controlled CAROLINA-COGNITION study

| Section       |                                                                                                                                                     | Page |
|---------------|-----------------------------------------------------------------------------------------------------------------------------------------------------|------|
| ESM Methods   | Description of derivation of A&E scores and regression methods used to derive predicted scores and power considerations                             | 2    |
| ESM Table 1   | Randomised trials involving DPP-4 inhibitors or sulphonylureas designed to test cognitive outcomes in type 2 diabetes                               | 3    |
| ESM Table 2   | Key inclusion criteria CAROLINA®                                                                                                                    | 5    |
| ESM Table 3   | Handling of protocol deviations and missing data points                                                                                             | 7    |
| ESM Table 4   | Baseline characteristics for patients dropping out of the study post-baseline.                                                                      | 8    |
| ESM Table 5   | Changes in MMSE, A&E z-score, TMT and VFT by accelerated cognitive decline (yes/no) regardless of treatment group at week 160 and end of follow-up. | 10   |
| ESM Table 6   | Results of the primary and secondary analyses for accelerated cognitive decline (ACD)                                                               | 12   |
| ESM Table 7   | Changes in cognitive or depression scores after 160 weeks of follow-up                                                                              | 13   |
| ESM Table 8   | Changes in cognitive or depression scores at end of follow-up                                                                                       | 14   |
| ESM Figure 1  | Handling of missing cognitive assessments                                                                                                           | 15   |
| ESM Figure 2  | Flowchart for CAROLINA-COGNITION study                                                                                                              | 16   |
| ESM Figure 3  | Participating countries in CAROLINA-COGNITION study                                                                                                 | 17   |
| ESM Figure 4. | HbA1c over time in participants in the CAROLINA-COGNITION study                                                                                     | 18   |
| ESM Figure 5  | Weight over time in participants in the CAROLINA-COGNITION study                                                                                    | 19   |
| ESM Figure 6  | Proportion of participants in the CAROLINA-COGNITION study with hypoglycaemia                                                                       | 20   |

## ESM Methods

### Description of A&E derivation and regression methods used to derive predicted scores

#### *A&E derivation*

- 1) The VFT scores for the letters F, A and S in 60 s were averaged to one VFT letter fluency score.
- 2) Because of word-frequency differences between different Latin-based languages, correction factors per language were calculated based on all baseline VFT scores of patients included in baseline primary analysis population (Ⓢ in ESM Figure 2).
- 3) The effect of language on VFT scores was evaluated by applying an ANCOVA model with fixed effects for language and covariates for age, gender, race and years of formal education to each of the 4 VFT scores (FAS in 15 seconds and in 60 seconds, and the category animals in 15 seconds and in 60 seconds). Correction factors were calculated by dividing the LS Mean of the specific language by the LS Mean of the reference language (LSmean language/ LSmean English). Each individual VFT score was corrected for the influence of language by multiplying the individual observed score by the calculated correction factor for the language in which the test was performed, so that all VFT scores for a category are comparable. The same correction factors were applied to baseline as well as to scores obtained post-baseline.
- 4) The TMT ratio was calculated, providing an index for executive functioning:  $(\text{TMT B} - \text{TMT A}) / \text{TMT A}$ .
- 5) After correction, the scores were converted into z-scores. Z-scores are used to standardize raw test scores and make them directly comparable. Z-scores were calculated as follows:  $\text{individuals z-score} = (\text{individuals test score} - \text{mean score of sample}) / \text{standard deviation of sample}$ . TMT and VFT scores were converted into z-scores. The z-scores of the category fluency (animals) and the letter fluency (F, A and S) were averaged to form an overall VFT z-score.

Because the TMT and the VFT both tap the domain “attention and executive functioning” (A&E) the z-scores on these two tests were averaged:  $\text{A\&E z-score} = \text{mean}(\text{overall VFT z-score 60 seconds}, -\text{TMT ratio z-score})$ . The negated TMT ratio and VFT overall z-score was averaged to compose one score for attention and executive functioning. The TMT ratio z-score was inverted, since higher scores mean lower performance. In secondary analysis the TMT and VFT were analyzed separately to control for potential test-specific effects.

#### *Regression methods used to develop predicted scores*

Predicted follow-up scores were calculated for each individual by means of an ANCOVA model. The following covariates (predictors) were added to the model: baseline performance, age, education, gender, race and test-retest interval. To derive the individual predicted follow-up scores, regression coefficients obtained from the ANCOVA model is multiplied by individual values on each predictor using the equation:  $\text{FU predict} = a + \beta_1 \times P_1 + \beta_2 \times P_2 + \dots + \beta_n \times P_n$ , where  $a$  is the intercept and  $\beta_1$  is the regression coefficient for predictor  $P_1$ ,  $\beta_2$  for predictor  $P_2$  and  $\beta_n$  for predictor  $P_n$ .

#### **Power considerations**

Accelerated cognitive decline was defined as an RBI score within the lowest 16% for the MMSE and/or A&E RBI score. This set was composed of three subsets of patients:

- i. Patients with ACD in MMSE and the A&E RBI, assumed to account for 2/3 of patients with ACD
- ii. Patients with ACD only in MMSE, assumed to account for 1/3 of patients with ACD
- iii. Patients with ACD only in A&E RBI, assumed to account for 1/3 of patients with ACD

We assumed that 2/3 of the patients with ACD on either the MMSE or A&E would also have an impairment on the other test (subset i), which would constitute  $2/3 \times 16\%$  of the study population, leaving  $1/3 \times 16\%$  each for people falling in subsets ii and iii  $1/3$ . The union of these subsets thus consists of  $(2/3 + 1/3 + 1/3) \times 16\%$  that is equal to 21.3%, which we therefore suggested to represent a range of 20 to 22% of the expected occurrence of the primary outcome event (Biessels GJ, et al. BMC Neurology 2018; 18: 7).

ESM Table 1. List of randomised trials involving DPP-4 inhibitors or sulphonylureas designed to test cognitive outcomes in type 2 diabetes.

| Trial               | Inclusion criteria                                                                                                                                                                                                                         | n     | Intervention                                                                                                                                                                                                                                                                           | Outcome measure                                                                                                                                                                                  | Result <sup>1</sup>                                                                                                                                                                                                                                                                                                                                                                                                                                          | Risk of bias                                                                                                                                   | Quality of evidence <sup>2</sup>                                                                    |
|---------------------|--------------------------------------------------------------------------------------------------------------------------------------------------------------------------------------------------------------------------------------------|-------|----------------------------------------------------------------------------------------------------------------------------------------------------------------------------------------------------------------------------------------------------------------------------------------|--------------------------------------------------------------------------------------------------------------------------------------------------------------------------------------------------|--------------------------------------------------------------------------------------------------------------------------------------------------------------------------------------------------------------------------------------------------------------------------------------------------------------------------------------------------------------------------------------------------------------------------------------------------------------|------------------------------------------------------------------------------------------------------------------------------------------------|-----------------------------------------------------------------------------------------------------|
| Abbatecola 2006 [1] | Treatment-naïve participants aged 60-78 years, from university outpatient offices.                                                                                                                                                         | 156   | Glibenclamide (glyburide) vs repaglinide                                                                                                                                                                                                                                               | Global cognitive function with MMSE at 12 months<br>Composite score of attention and executive functioning (TMT, VFT and digit span) at 12 months                                                | MMSE difference 0.90 (95% CI: 0.12, 1.68) (i.e. small effect in favour of glibenclamide)<br>MD: 0.00 (95% CI: -0.01, 0.01)                                                                                                                                                                                                                                                                                                                                   | Unclear (no description of random sequence generation, allocation concealment, blinding of participants and personnel and selective reporting) | Low (risk of bias and single study with small sample size)                                          |
| Ryan 2006 [2]       | Adults receiving metformin combination therapy and HbA1c ≤ 64 mmol/mol (8%), BMI ≤ 27 kg/m <sup>2</sup> , no evidence of dementia (MMSE ≥ 27) no evidence of depression according to mini international neuropsychiatric interview (MINI). | 145   | Rosiglitazone + metformin vs glibenclamide (glyburide) + metformin                                                                                                                                                                                                                     | Cognitive test scores (DSST, RAVLT immediate, CANTAB) after 24 weeks<br><br>Composite scores for the cognitive domains: working memory, learning ability and cognitive efficiency after 24 weeks | DSST: MD: -0.20 (95% CI -0.50, -0.10)<br>RAVLT immediate: MD -1.40 (95% CI -1.70, -1.10) in favor of rosiglitazone<br>CANTAB:<br>1) small numerical advantages for rosiglitazone plus metformin on the items of Paired Associates Learning, Pattern Recognition Memory and Rapid Visual Information Processing.<br>2) small numerical advantage for glibenclamide (glyburide) plus metformin on the item Reaction Time<br>No differences on composite scores | Unclear (no methods for allocation, blinding of participants and personnel identified, no protocol identified)                                 | Low (risk of bias, single study with small sample size, imprecision)                                |
| ADVANCE 2008 [3]    | ≥ 55 years, ≥ 30 years, history of major macro- or micro-vascular disease or at least one other risk factor for vascular disease                                                                                                           | 11140 | Intensive glucose control (gliclazide), discontinued other sulphonylureas, plus other treatments, to achieve HbA1c of ≤ 48 mmol/mol (6.5%) vs standard-control (former gliclazide use, required to substitute with other sulphonylurea with target HbA1c levels from local guidelines) | Number of participants with cognitive decline on MMSE (3 or more points) (yes/no)<br><br>Incidence of dementia (based on DSM-IV criteria) After median follow-up duration of 5 years.            | RR 0.98 (0.88, 1.08) (i.e. no difference between groups)<br><br>RR 1.27 (0.87, 1.85) (i.e. no differences between groups)                                                                                                                                                                                                                                                                                                                                    | Unclear (no description in random sequence generation, allocation concealment and blinding of participants and personnel)                      | Moderate (risk of bias)<br><br>Low (risk of bias and low event rate; 61 intervention vs 48 control) |

|                   |                                                                                                                                                                   |      |                                                                                                                                              |                                                                                                                                                                                                                        |                                                                                            |                                                                                                                                                                                       |                                                                                                  |
|-------------------|-------------------------------------------------------------------------------------------------------------------------------------------------------------------|------|----------------------------------------------------------------------------------------------------------------------------------------------|------------------------------------------------------------------------------------------------------------------------------------------------------------------------------------------------------------------------|--------------------------------------------------------------------------------------------|---------------------------------------------------------------------------------------------------------------------------------------------------------------------------------------|--------------------------------------------------------------------------------------------------|
| Perna 2018 [4]    | Age > 65 years<br><br>Healthy cognition (exclusion: MMSE $\geq$ 27)<br><br>Absence of neurological disease, mental disorders, sensorial impairment and alcoholism | 39   | SGLT2-inhibitor (on top of max. dose metformin as stable regime)<br><br>vs<br><br>Incretins (on top of max. dose metformin as stable regime) | Differences between groups on mean cognitive change on VFT, AMT BSRT.<br><br>After 52 weeks                                                                                                                            | VFT: -0.65 (-1.86, -0.56)<br><br>AMT: -0.34 (-1.64, 0.96)<br><br>BSRT: -3.57 (-8.80, 1.66) | High risk because of lack of allocation concealment. Unclear risk because no methodology for blinding of participants, personnel and outcome assessors.                               | Low (risk of bias, single study with small sample size, imprecision for some cognitive outcomes) |
| Biessels 2019 [5] | High cardiovascular and renal risk                                                                                                                                | 1545 | Linagliptin<br><br>vs<br><br>placebo<br><br><br>(on top of standard care)                                                                    | Incidence of accelerated cognitive decline with RBI $\leq$ 16 <sup>th</sup> percentile on either MMSE or attention and executive composite z-score (VFT and/or TMT ratio) after median follow-up duration of 2.5 years | OR 0.96 (95% CI: 0.77, 1.19)                                                               | Low (note: substantial drop-out of > 30%, however, inherent to study design (high CV risk), drop-out was balanced between treatment arms, reasons were reported, and neutral outcome) | Moderate (relative short follow-up duration)                                                     |

<sup>1</sup> Results for intervention group. <sup>2</sup> Evaluation according to GRADE (Working Group grades of evidence): High quality: further research is very unlikely to change our confidence in the estimate of effect. Moderate quality: further research is likely to have an important impact on our confidence in the estimate of effect and may change the estimate. Low quality: further research is very likely to have an important impact on our confidence in the estimate of effect and is likely to change the estimate. Very low quality: we are very uncertain about the estimate. Where applicable, evaluation of risk of bias and quality of evidence is adapted from Areosa Sastre et al. [6]. MD: mean difference, RR: relative risk, OR: odds ratio, CANTAB: Cambridge Neuropsychological Test Automated Battery. DSST: Digit Symbol Substitution Test RAVLT: Rey Auditory Verbal Learning Test, MMSE: Mini-Mental State Examination, DSM-IV: Diagnostic and Statistical Manual of Mental Disorders. RBI: regression based index score. VFT: verbal fluency test. TMT: trail making test. AMT: Attentive Matrices Test. BSRT: Babcock Story Recall Test.

## References.

1. Abbatecola AM, Rizzo MR, Barbieri M, et al. Postprandial plasma glucose excursions and cognitive functioning in aged type 2 diabetics. *Neurology* 2006;67:235-40
2. Ryan CM, Freed MI, Rood JA, Cobitz AR, Waterhouse BR, Strachan MW. Improving metabolic control leads to better working memory in adults with type 2 diabetes. *Diabetes Care* 2006;29:345-51
3. de Galan BE, Zoungas S, Chalmers J, et al. Cognitive function and risks of cardiovascular disease and hypoglycaemia in patients with type 2 diabetes: the Action in Diabetes and Vascular Disease: Preterax and Diamicron Modified Release Controlled Evaluation (ADVANCE) trial. *Diabetologia* 2009; 52: 2328–36
4. Perna S, Mainardi M, Astrone P, et al. 12-month effects of incretins versus SGLT2-Inhibitors on cognitive performance and metabolic profile. A randomized clinical trial in the elderly with Type-2 diabetes mellitus. *Clin Pharmacol* 2018;10:141-51
5. Biessels GJ, Verhagen C, Janssen J, et al. Effect of linagliptin on cognitive performance in patients with type 2 diabetes and cardiorenal comorbidities: the CARMELINA randomized trial. *Diabetes Care* 2019;42:1930-8
6. Areosa Sastre A, Vernooij RW, González-Colaço Harmand M, Martínez G. Effect of the treatment of Type 2 diabetes mellitus on the development of cognitive impairment and dementia. *Cochrane Database Syst Rev.* 2017 Jun 15;6:CD003804.

ESM Table 2. Key inclusion criteria CAROLINA®

| Insufficient glycaemic control defined as                                               | Elevated risk of cardiovascular events defined as any (one or more) of the criteria (A, B, C or D)                                                                    |
|-----------------------------------------------------------------------------------------|-----------------------------------------------------------------------------------------------------------------------------------------------------------------------|
| one of the criteria (A or B)                                                            | <i>AND</i>                                                                                                                                                            |
| (A) HbA1c 48–69 mmol/mol (6.5 - 8.5%) while patient is treatment naïve or treated with: | (A) Previous vascular disease:                                                                                                                                        |
| (I) Metformin monotherapy                                                               | (I) MI (>6 weeks prior to informed consent IC)                                                                                                                        |
| (II) $\alpha$ -Glucosidase inhibitor monotherapy (e.g. acarbose, voglibose)             | (II) Documented coronary artery disease ( $\geq$ 50% luminal diameter narrowing of left main coronary artery or in at least two major coronary arteries in angiogram) |
| (III) Metformin plus $\alpha$ -glucosidase inhibitor (e.g. acarbose, voglibose)         | (III) Percutaneous coronary intervention (>6 weeks prior to IC)                                                                                                       |
|                                                                                         | (IV) Coronary artery bypass grafting (>4 years prior to IC) or with recurrent angina following surgery                                                                |
|                                                                                         | (V) Ischaemic or haemorrhagic stroke (>3 months prior to IC)                                                                                                          |
|                                                                                         | (VI) Peripheral occlusive arterial disease                                                                                                                            |
| (B) HbA1c 48–58 mmol/mol (6.5 - 7.5%) while patient is treated with:                    | (B) Evidence of vascular-related end-organ damage:                                                                                                                    |
| (I) SU monotherapy                                                                      | (I) Moderately impaired renal function (as defined by MDRD formula) with eGFR 30–59 ml/min/1.73 m <sup>2</sup>                                                        |
| (II) Glinide monotherapy (e.g. repaglinide, nateglinide)                                | (II) Random spot urinary albumin:creatinine ratio $\geq$ 30 $\mu$ g/mg                                                                                                |
| (III) Metformin plus SU (for a maximum of 5 years)                                      | in two of three unrelated specimens in the previous 12 months.                                                                                                        |
| (IV) Metformin plus glinide (for a maximum of 5 years)                                  | (III) Proliferative retinopathy defined as retinal neovascularization or previous retinal laser coagulation therapy                                                   |
| (V) $\alpha$ -Glucosidase inhibitor plus SU (for a maximum of 5 years)                  |                                                                                                                                                                       |
| (VI) $\alpha$ -Glucosidase inhibitor plus glinide (for a maximum of 5 years)            |                                                                                                                                                                       |
|                                                                                         | C) Age $\geq$ 70 years                                                                                                                                                |
|                                                                                         | D) At least two of the following cardiovascular risk factors:                                                                                                         |

(I) Duration of type 2 diabetes >10 years

(II) Systolic BP >140 mmHg (or on at least 1 BP-lowering treatment) <6 months prior to IC

(III) Current daily cigarette smoking

(IV) LDL-cholesterol  $\geq$ 3.5 mmol/L (or specific current treatment for this lipid abnormality) <6 months prior to IC

CAROLINA: CARdiovascular Outcome Trial of LINAgliptin Versus Glimepiride in Type 2 Diabetes; IC: informed consent; BP: blood pressure; SU: sulphonylurea; MI: myocardial infarction; MDRD: modified diet in renal disease

ESM Table 3. Predefined sensitivity analyses

The table illustrates how potential or de facto protocol deviations and missing data points were handled through five sensitivity analyses.

| <i>Sensitivity analysis</i>                                                                                                                                             |                                                                                                                                                                                                                                                                                                       |
|-------------------------------------------------------------------------------------------------------------------------------------------------------------------------|-------------------------------------------------------------------------------------------------------------------------------------------------------------------------------------------------------------------------------------------------------------------------------------------------------|
| 1. Check the influence of inappropriate inclusion, potentially confounding co-morbid conditions and trial medication use (Ⓒ in ESM Figure 2)                            | <p>Participants were excluded from the analysis if:</p> <ul style="list-style-type: none"> <li>• major inclusion or exclusion criteria are violated</li> <li>• incorrect trial medication is taken</li> <li>• major neurological or psychiatric disease was present at baseline</li> </ul>            |
| 2. Check the influence of classifying participants who did not understand the instructions at follow-up as having accelerated cognitive decline                         | <p>The last observation carried forward method was used for participants with missing MMSE and A&amp;E RBI-scores at follow-up if the reason for missing is the inability of the participant to understand the instructions (instead of classifying them as having accelerated cognitive decline)</p> |
| 3. Check for bias by differential lost to follow-up (worst-case scenario).                                                                                              | <p>All participants with missing MMSE and A&amp;E RBI-scores at follow-up were considered to have accelerated cognitive decline</p>                                                                                                                                                                   |
| 4. Check the impact of further baseline variables on the RBI score result, check for confounding by depression symptoms.                                                | <p>Age, gender, years of formal education, race, ethnicity and language and CES-D (score &lt;16, ≥16) are included as covariates in the logistic regression analysis.</p>                                                                                                                             |
| 5. Check for impact of the excluding participants that did not have their last post-baseline visit on treatment (i.e. ≤ 7 days after treatment stop, Ⓓ in ESM Figure 2) | <p>The latest post-baseline assessment was used as end of follow-up (regardless if participants were on-treatment). Time windows were not applicable here. Measurements before 700 days were not included.</p>                                                                                        |

ESM Table 4. Baseline characteristics for patients dropping out of the study.

Selected baseline characteristics resulting from the primary analysis contrasted by the patients who dropped out of the study post-baseline. Data are *n* (%) or mean±standard deviation unless otherwise stated.

|                                         | Primary analysis population |                        | Population dropping out† |                       |
|-----------------------------------------|-----------------------------|------------------------|--------------------------|-----------------------|
|                                         | Linagliptin                 | Glimepiride            | Linagliptin              | Glimepiride           |
|                                         | ( <i>n</i> =1618)           | ( <i>n</i> =1545)      | ( <i>n</i> =267)         | ( <i>n</i> =299)      |
| Male/Female                             | 1002 (61.9)/ 616 (38.1)     | 958 (62.0)/ 587 (38.0) | 167 (62.5)/ 100 (37.5)   | 183 (61.2)/116 (38.8) |
| Age, years                              | 64.4±9.1                    | 64.4±9.3               | 64.0±10.6                | 65.0±10.2             |
| History of myocardial infarction        | 266 (14.0)                  | 187 (12.1)             | 39 (14.6)                | 51 (17.1)             |
| History of cerebrovascular disease      | 169 (10.4)                  | 154 (10.0)             | 31 (11.6)                | 39 (13.0)             |
| Known coronary artery disease           | 394 (24.4)                  | 366 (23.7)             | 66 (24.7)                | 95 (31.8)             |
| Education level, years                  | 10.8±3.4                    | 10.8±3.5               | 10.9±3.7                 | 10.9±3.4              |
| Body Mass Index, kg/m <sup>2</sup>      | 30.8±5.0                    | 30.7±4.9               | 30.9±5.6                 | 30.8±5.4              |
| Mini-mental state examination score     | 28.5±1.7                    | 28.5±1.7               | 28.3±1.7                 | 28.2±1.8              |
| Depression score according to CES-D     | 8.7±8.0                     | 9.3±8.3                | 9.7±8.8                  | 10.6±9.3              |
| <16                                     | 1335 (82.5)                 | 1242 (80.4)            | 206 (77.2)               | 223 (74.6)            |
| ≥16                                     | 250 (15.5)                  | 278 (18.0)             | 55 (20.6)                | 63 (21.1)             |
| Missing                                 | 33 (2.0)                    | 25 (1.6)               | 6 (2.2)                  | 13 (4.3)              |
| eGFR (MDRD), ml/min/1.73 m <sup>2</sup> | 75.8±19.0                   | 76.9±18.8              | 75.4±19.6                | 75.2±19.7             |
| Type 2 diabetes duration, years         | 7.7±6.2                     | 7.4±5.9                | 8.1±6.6                  | 8.0±6.5               |
| HbA1c, mmol/mol (%)                     | 54.3±6.0 (7.1±0.5)          | 54.5±6.2 (7.1±0.6)     | 55.3±6.4 (7.2±0.6)       | 54.8±6.2 (7.2±0.6)    |
| Glucose-lowering medication             |                             |                        |                          |                       |
| Metformin                               | 1348 (83.3)                 | 1306 (84.5)            | 231 (86.5)               | 257 (86.0)            |
| Sulphonylurea                           | 434 (26.8)                  | 422 (27.3)             | 61 (22.8)                | 75 (25.1)             |
| Glinide                                 | 13 (0.8)                    | 13 (0.8)               | 1 (0.4)                  | 2 (0.7)               |
| α-glucosidase inhibitor                 | 43 (2.7)                    | 34 (2.2)               | 2 (0.7)                  | 10 (3.3)              |
| Thiazolidinedione                       | 1 (0.1)                     | 2 (0.1)                | 0 (0.0)                  | 0 (0.0)               |
| Insulin use                             | 1 (0.1)                     | 0 (0.0)                | 0 (0.0)                  | 0 (0.0)               |



Cardiovascular medications

|                                |             |             |            |            |
|--------------------------------|-------------|-------------|------------|------------|
| Lipid-lowering                 | 1197 (74.0) | 1180 (76.4) | 187 (70.0) | 221 (73.9) |
| Statins                        | 1111 (68.7) | 1113 (72.0) | 175 (65.5) | 206 (68.9) |
| Antihypertensives              | 1428 (88.3) | 1387 (89.8) | 240 (89.9) | 272 (91.0) |
| Systolic blood pressure, mmHg  | 135.9±15.9  | 136.2±16.4  | 136.0±16.6 | 136.8±16.1 |
| Diastolic blood pressure, mmHg | 78.8±9.5    | 78.8±9.3    | 78.6±9.8   | 79.0±9.8   |
| LDL cholesterol, mmol/L        | 2.4±0.9     | 2.4±0.9     | 2.5±0.9    | 2.5±0.9    |

---

<sup>†</sup>See ESM Figure 2: participants dropped-out between ③ and ④ i.e. participants without a post-baseline RBI assessment. Participants with a post-baseline assessment that was not on treatment (n=289; i.e. between ④ and ⑤) are considered in sensitivity analysis 5 (ESM Table 3). CES-D: Center for Epidemiologic Studies Depression Scale. eGFR: estimated glomerular filtration rate, LDL: low-density lipoprotein, MDRD: Modification of Diet in Renal Disease study equation.

ESM Table 5. Changes in MMSE, A&E z-score, TMT and VFT by accelerated cognitive decline (yes/no) regardless of treatment group at week 160 and end of follow-up.

|                                                          | Accelerated cognitive decline<br>at week 160* |              | Accelerated cognitive decline<br>at end of follow-up |              |
|----------------------------------------------------------|-----------------------------------------------|--------------|------------------------------------------------------|--------------|
| RBI at or below 16 <sup>th</sup> percentile <sup>†</sup> | Yes                                           | No           | Yes                                                  | No           |
| <u>MMSE score</u>                                        |                                               |              |                                                      |              |
| Follow-up                                                | 26.2 (2.7)                                    | 29.0 (1.2)   | 25.7 (3.7)                                           | 29.0 (1.2)   |
| <i>n</i>                                                 | 827                                           | 2220         | 628                                                  | 1687         |
| Change from baseline                                     | -1.9 (2.5)                                    | 0.4 (1.4)    | -2.5 (3.6)                                           | 0.4 (1.6)    |
| <i>n</i>                                                 | 827                                           | 2220         | 628                                                  | 1687         |
| <u>A&amp;E z-score</u>                                   |                                               |              |                                                      |              |
| Follow-up                                                | -0.7 (0.8)                                    | 0.2 (0.5)    | -0.7 (0.8)                                           | 0.1 (0.6)    |
| <i>n</i>                                                 | 812                                           | 2151         | 606                                                  | 1674         |
| Change from baseline                                     | -0.6 (0.8)                                    | 0.1 (0.6)    | -0.7 (1.0)                                           | 0.1 (0.7)    |
| <i>n</i>                                                 | 800                                           | 2119         | 596                                                  | 1648         |
| <u>TMT A score [in sec]</u>                              |                                               |              |                                                      |              |
| Follow-up                                                | 62.9 (42.3)                                   | 50.1 (24.0)  | 63.7 (43.7)                                          | 51.6 (25.9)  |
| <i>n</i>                                                 | 728                                           | 2013         | 559                                                  | 1589         |
| Change from baseline                                     | 4.4 (34.0)                                    | 1.7 (20.4)   | 6.3 (37.2)                                           | 3.1 (22.1)   |
| <i>n</i>                                                 | 693                                           | 1918         | 524                                                  | 1509         |
| <u>TMT B score [in sec]</u>                              |                                               |              |                                                      |              |
| Follow-up                                                | 164.9 (79.3)                                  | 101.5 (47.5) | 170.1 (81.5)                                         | 110.1 (53.0) |
| <i>n</i>                                                 | 727                                           | 2016         | 545                                                  | 1585         |
| Change from baseline                                     | 38.9 (71.7)                                   | -2.4 (41.1)  | 47.4 (78.9)                                          | 6.5 (50.4)   |
| <i>n</i>                                                 | 665                                           | 1881         | 490                                                  | 1479         |
| <u>TMT ratio</u>                                         |                                               |              |                                                      |              |
| Follow-up                                                | 2.3 (1.4)                                     | 1.1 (0.6)    | 2.4 (1.5)                                            | 1.2 (0.7)    |
| <i>n</i>                                                 | 711                                           | 1994         | 534                                                  | 1573         |
| Change from baseline                                     | 0.9 (1.4)                                     | -0.1 (0.8)   | 1.0 (1.6)                                            | -0.01 (0.9)  |
| <i>n</i>                                                 | 642                                           | 1836         | 471                                                  | 1445         |

|                                                          |            |            |            |            |
|----------------------------------------------------------|------------|------------|------------|------------|
| VFT FAS score                                            | Yes        | No         | Yes        | No         |
| Follow-up                                                | 7.4 (3.6)  | 9.6 (3.9)  | 7.1 (3.8)  | 9.8 (4.4)  |
| <i>n</i>                                                 | 753        | 2032       | 562        | 1566       |
| Change from baseline                                     | -0.9 (2.6) | 0.04 (2.6) | -1.3 (3.2) | 0.2 (3.1)  |
| <i>n</i>                                                 | 748        | 2019       | 557        | 1556       |
| VFT animals score                                        | Yes        | No         | Yes        | No         |
| Follow-up                                                | 12.8 (5.5) | 16.6 (6.6) | 12.4 (6.2) | 16.8 (7.4) |
| <i>n</i>                                                 | 740        | 1998       | 548        | 1518       |
| Change from baseline                                     | -1.9 (5.4) | 0.1 (5.9)  | -2.5 (6.5) | 0.1 (7.1)  |
| <i>n</i>                                                 | 731        | 1963       | 535        | 1494       |
| RBI at or below 10 <sup>th</sup> percentile <sup>‡</sup> |            |            |            |            |
| <u>MMSE score</u>                                        | Yes        | No         | Yes        | No         |
| Follow-up                                                | 25.7±2.9   | 28.8±1.4   | 25.0±4.2   | 28.8±1.5   |
| <i>n</i>                                                 | 539        | 2508       | 411        | 1904       |
| Change from baseline                                     | -2.4±2.7   | 0.2±1.5    | -3.1±4.1   | 0.2±1.7    |
| <i>n</i>                                                 | 539        | 2508       | 411        | 1904       |
| <u>A&amp;E z-score</u>                                   | Yes        | No         | Yes        | No         |
| Follow-up                                                | -0.8±0.8   | 0.1±0.6    | -0.9±0.9   | 0.1±0.6    |
| <i>n</i>                                                 | 526        | 2437       | 394        | 1886       |
| Change from baseline                                     | -0.7±0.9   | 0.1±0.6    | -0.8±1.0   | 0.02±0.68  |
| <i>n</i>                                                 | 520        | 2399       | 387        | 1857       |

\*Data on cognitive change in the first time window are based on actual or interpolated cognitive values (ESM Figure 1, scenario 1, 2 and 3); data from all participants in the primary analyses are represented in this time window, but numbers per test vary according to test availability at both baseline and follow-up. Because A&E z-scores, VFT and TMT scores could be missing at baseline, *n* for follow-up scores can be higher than *n* for calculated change from baseline.

Data on cognitive change in the second time window only involve participants with an actual assessment in that window (ESM Figure 1, scenario 1 and 3); data from participants with an end of treatment assessment only in time window 1 (who are included in the primary analysis) are not included in these averages.

MMSE: Mini-Mental State Examination, A&E: attention and executive functioning, TMT: Trail Making Test, VFT: Verbal Fluency Test, RBI: regression-based index score. ‡†: RBI 10<sup>th</sup>/16<sup>th</sup> percentile thresholds: at week 160 for MMSE z-score: -1.3388/-0.8562; at end of follow-up for MMSE z-score: -1.0927/-0.7218; at week 160 for A&E z-score: -1.2281/-0.8640; at end of follow-up for A&E z-score: -1.1723/-0.8839.

ESM Table 6. Results of the primary and secondary analyses for accelerated cognitive decline (ACD).

|                                                                                 | Linagliptin<br>( <i>n</i> = 1618 ) | Glimepiride<br>( <i>n</i> = 1545) | Comparison               |                  |
|---------------------------------------------------------------------------------|------------------------------------|-----------------------------------|--------------------------|------------------|
|                                                                                 | <i>n</i> (%)                       | <i>n</i> (%)                      | OR [95% CI] <sup>1</sup> | <i>p</i> - value |
| Primary endpoint:                                                               |                                    |                                   |                          |                  |
| Incidence of ACD at EOT based on 16th percentile of RBI score                   | 449 (27.8)                         | 426 (27.6)                        | 1.01 [0.86, 1.18]        | 0.91             |
| Secondary and further endpoints :                                               |                                    |                                   |                          |                  |
| Incidence of ACD at week 160 based on RBI score.                                | 446 (27.6)                         | 406 (26.3)                        | 1.07 [0.91, 1.25]        | 0.41             |
| Incidence of ACD based on z-score at EOT <sup>2</sup>                           | 537 (33.2)                         | 509 (32.9)                        | 1.01 [0.87, 1.17]        | 0.88             |
| Incidence of ACD based on z-score at week 160 <sup>2</sup>                      | 498 (30.8)                         | 467 (30.2)                        | 1.03 [0.88, 1.19]        | 0.74             |
| Incidence of ACD at EOT based on 10th percentile of RBI Score <sup>3</sup>      | 296 (18.3)                         | 291 (18.8)                        | 0.96 [0.81, 1.15]        | 0.70             |
| Incidence of ACD at week 160 based on 10th percentile of RBI score <sup>3</sup> | 295 (18.2)                         | 263 (17.0)                        | 1.09 [0.91, 1.31]        | 0.37             |
| Incidence of ACD at EOT based on MMSE <sup>4</sup>                              | 116 (7.2)                          | 123 (8.0)                         | 0.90 [0.69, 1.17]        | 0.41             |
| Incidence of ACD at week 160 based on MMSE <sup>4</sup>                         | 98 (6.1)                           | 93 (6.0)                          | 1.01 [0.75, 1.35]        | 0.95             |

1: Odds Ratio (OR) along with the 95% Profile Likelihood Confidence Interval (CI) and the two-sided *p*-value using a logistic regression including treatment as a factor. 2: Incidence of accelerated cognitive decline based on 16th percentile of z-score for MMSE and/or A&E. 3: Incidence of accelerated cognitive decline based on 10th percentile of RBI score. 4: Incidence of accelerated cognitive decline at EOT based on MMSE score of <24 or a decline of >4 points in MMSE score at EOT relative to baseline ACD: cognitive accelerated decline.

The R<sup>2</sup>'s obtained from the ANCOVA (see ESM text methods 1) were 25.4% and 16.5%, respectively for the predicted MMSE scores at 160 weeks and at EOT. The corresponding R<sup>2</sup>'s were 24.5% and 18.9% for the predicted A&E z-scores.

ESM Table 7. Changes in cognitive or depression scores after 160 weeks of follow-up.

|                                                       | Linagliptin<br>(n=1618) | Glimepiride<br>(n=1545) | Comparison                      | <i>p</i> -value |
|-------------------------------------------------------|-------------------------|-------------------------|---------------------------------|-----------------|
| Changes ( $\Delta$ ) from baseline in raw or z-scores | Adjusted mean<br>(SE)   | Adjusted mean<br>(SE)   | Adjusted mean<br>(SE) [95% CI]  |                 |
| $\Delta$ MMSE score                                   | -0.24 (0.049)           | -0.23 (0.050)           | -0.01 (0.070)<br>[-0.14, 0.13]  | 0.9343          |
| $\Delta$ MMSE z-score                                 | -0.14 (0.029)           | -0.14 (0.030)           | ~0.00 (0.042)<br>[-0.08, 0.08]  | 0.9343          |
| $\Delta$ A&E z-score                                  | -0.05 (0.016)           | -0.06 (0.017)           | 0.01 (0.024)<br>[-0.04, 0.05]   | 0.8108          |
| $\Delta$ TMT A score                                  | 2.33 (0.640)            | 2.79 (0.658)            | -0.46 (0.918)<br>[-2.26, 1.34]  | 0.6135          |
| $\Delta$ TMT A z-score                                | 0.08 (0.023)            | 0.10 (0.024)            | -0.02 (0.033)<br>[-0.08, 0.05]  | 0.6135          |
| $\Delta$ TMT B score                                  | 7.95 (1.400)            | 9.92 (1.431)            | -1.96 (2.002)<br>[-5.89, 1.96]  | 0.3269          |
| $\Delta$ TMT B z-score                                | 0.13 (0.023)            | 0.16 (0.024)            | -0.03 (0.033)<br>[-0.10, 0.03]  | 0.3270          |
| $\Delta$ TMT ratio score                              | 0.13 (0.027)            | 0.16 (0.028)            | -0.04 (0.039)<br>[-0.11, 0.04]  | 0.3364          |
| $\Delta$ TMT ratio z-score                            | 0.12 (0.026)            | 0.16 (0.027)            | -0.04 (0.038)<br>[-0.11, 0.04]  | 0.3364          |
| $\Delta$ VFT animals -15 seconds z-score              | ~0.00 (0.024)           | -0.04 (0.024)           | 0.04 (0.034)<br>[-0.03, 0.11]   | 0.2238          |
| $\Delta$ VFT FAS -15 seconds z-score                  | -0.05 (0.018)           | -0.02 (0.018)           | -0.02 (0.026)<br>[-0.07, 0.03]  | 0.3321          |
| $\Delta$ VFT animals - 60 seconds z-score             | -0.08 (0.022)           | -0.07 (0.023)           | ~0.00 (0.032)<br>[-0.07, 0.06]  | 0.8919          |
| $\Delta$ VFT FAS - 60 seconds z-score                 | -0.06 (0.016)           | -0.05 (0.016)           | -0.01 (0.023)<br>[-0.05, 0.04]  | 0.6775          |
| $\Delta$ VFT overall - 15 seconds z-score             | -0.02 (0.017)           | -0.03 (0.018)           | 0.01 (0.025)<br>[-0.04, 0.06]   | 0.6860          |
| $\Delta$ VFT overall - 60 seconds z-score             | -0.07 (0.016)           | -0.07 (0.016)           | ~0.00 (0.022)<br>[-0.05, 0.04]  | 0.9664          |
| $\Delta$ CES-D score                                  | 1.60 (0.239)            | 2.29 (0.246)            | -0.69 (0.343)<br>[-1.36, -0.02] | 0.0448          |

For comparison: adjusted means (SE) along with the 95% Confidence Interval (CI) and the two-sided *p*-value are shown using an MMRM model including treatment, week and baseline value, treatment by week interaction and baseline by week interaction as covariates. MMSE: Mini-Mental State Examination VFT: Verbal Fluency Test TMT: Trail Making Test TMT ratio: (TMT-B – TMT-A)/TMT-A, CES-D: Center for Epidemiologic Studies Depression Scale, ACD: accelerated cognitive decline

ESM table 8. Changes in cognitive or depression scores at end of follow-up.

|                                                       | Linagliptin<br>(n = 1618) | Glimepiride<br>(n = 1545) | Comparison                     | p- value |
|-------------------------------------------------------|---------------------------|---------------------------|--------------------------------|----------|
| Changes ( $\Delta$ ) from baseline in raw or z-scores | Adjusted mean<br>(SE)     | Adjusted mean<br>(SE)     | Adjusted mean<br>(SE) [95% CI] |          |
| $\Delta$ MMSE score                                   | -0.42 (0.071)             | -0.47 (0.074)             | 0.05 (0.103)<br>[-0.15, 0.25]  | 0.6383   |
| $\Delta$ MMSE z-score                                 | -0.25 (0.042)             | -0.28 (0.044)             | 0.03 (0.061)<br>[-0.09, 0.15]  | 0.6383   |
| $\Delta$ A&E z-score                                  | -0.11 (0.020)             | -0.12 (0.021)             | 0.01 (0.029)<br>[-0.05, 0.07]  | 0.7721   |
| $\Delta$ TMT A score                                  | 3.48 (0.770)              | 4.35 (0.799)              | -0.87 (1.110)<br>[-3.05, 1.31] | 0.4335   |
| $\Delta$ TMT A z-score                                | 0.13 (0.028)              | 0.16 (0.029)              | -0.03 (0.040)<br>[-0.11, 0.05] | 0.4336   |
| $\Delta$ TMT B score                                  | 16.52 (1.749)             | 18.11 (1.804)             | -1.59 (2.513)<br>[-6.52, 3.34] | 0.5264   |
| $\Delta$ TMT B z-score                                | 0.27 (0.029)              | 0.30 (0.030)              | -0.03 (0.041)<br>[-0.11, 0.06] | 0.5265   |
| $\Delta$ TMT ratio score                              | 0.25 (0.032)              | 0.24 (0.034)              | 0.02 (0.047)<br>[-0.08, 0.11]  | 0.7332   |
| $\Delta$ TMT ratio z-score                            | 0.25 (0.032)              | 0.23 (0.033)              | 0.02 (0.046)<br>[-0.07, 0.11]  | 0.7332   |
| $\Delta$ VFT animals -15 seconds z-score              | 0.03 (0.031)              | 0.04 (0.032)              | -0.01 (0.045)<br>[-0.09, 0.08] | 0.8941   |
| $\Delta$ VFT FAS -15 seconds z-score                  | -0.01 (0.023)             | -0.00 (0.023)             | -0.01 (0.033)<br>[-0.07, 0.06] | 0.8049   |
| $\Delta$ VFT animals - 60 seconds z-score             | -0.09 (0.030)             | -0.11 (0.031)             | 0.03 (0.044)<br>[-0.06, 0.11]  | 0.5605   |
| $\Delta$ VFT FAS - 60 seconds z-score                 | -0.05 (0.021)             | -0.05 (0.022)             | -0.00 (0.031)<br>[-0.06, 0.06] | 0.9814   |
| $\Delta$ VFT overall - 15 seconds z-score             | 0.01 (0.023)              | 0.02 (0.024)              | -0.00 (0.033)<br>[-0.07, 0.06] | 0.8835   |
| $\Delta$ VFT overall - 60 seconds z-score             | -0.07 (0.021)             | -0.09 (0.022)             | 0.02 (0.031)<br>[-0.04, 0.08]  | 0.5482   |
| $\Delta$ CES-D score                                  | 1.46 (0.259)              | 1.54 (0.268)              | -0.07 (0.373)<br>[-0.80, 0.66] | 0.8443   |

For comparison: adjusted means (SE) along with the 95% Confidence Interval (CI) and the two-sided *p*-value are shown using an MMRM model including treatment, week and baseline value, treatment by week interaction and baseline by week interaction as covariates. MMSE: Mini-Mental State Examination, VFT: Verbal Fluency Test, TMT: Trail Making Test, TMT ratio: (TMT-B – TMT-A)/TMT-A, CES-D: Center for Epidemiologic Studies Depression Scale, ACD: accelerated cognitive decline

ESM Figure 1. Handling of missing cognitive assessments for the primary cognitive outcome (occurrence of ACD at end of follow-up and at week 160).

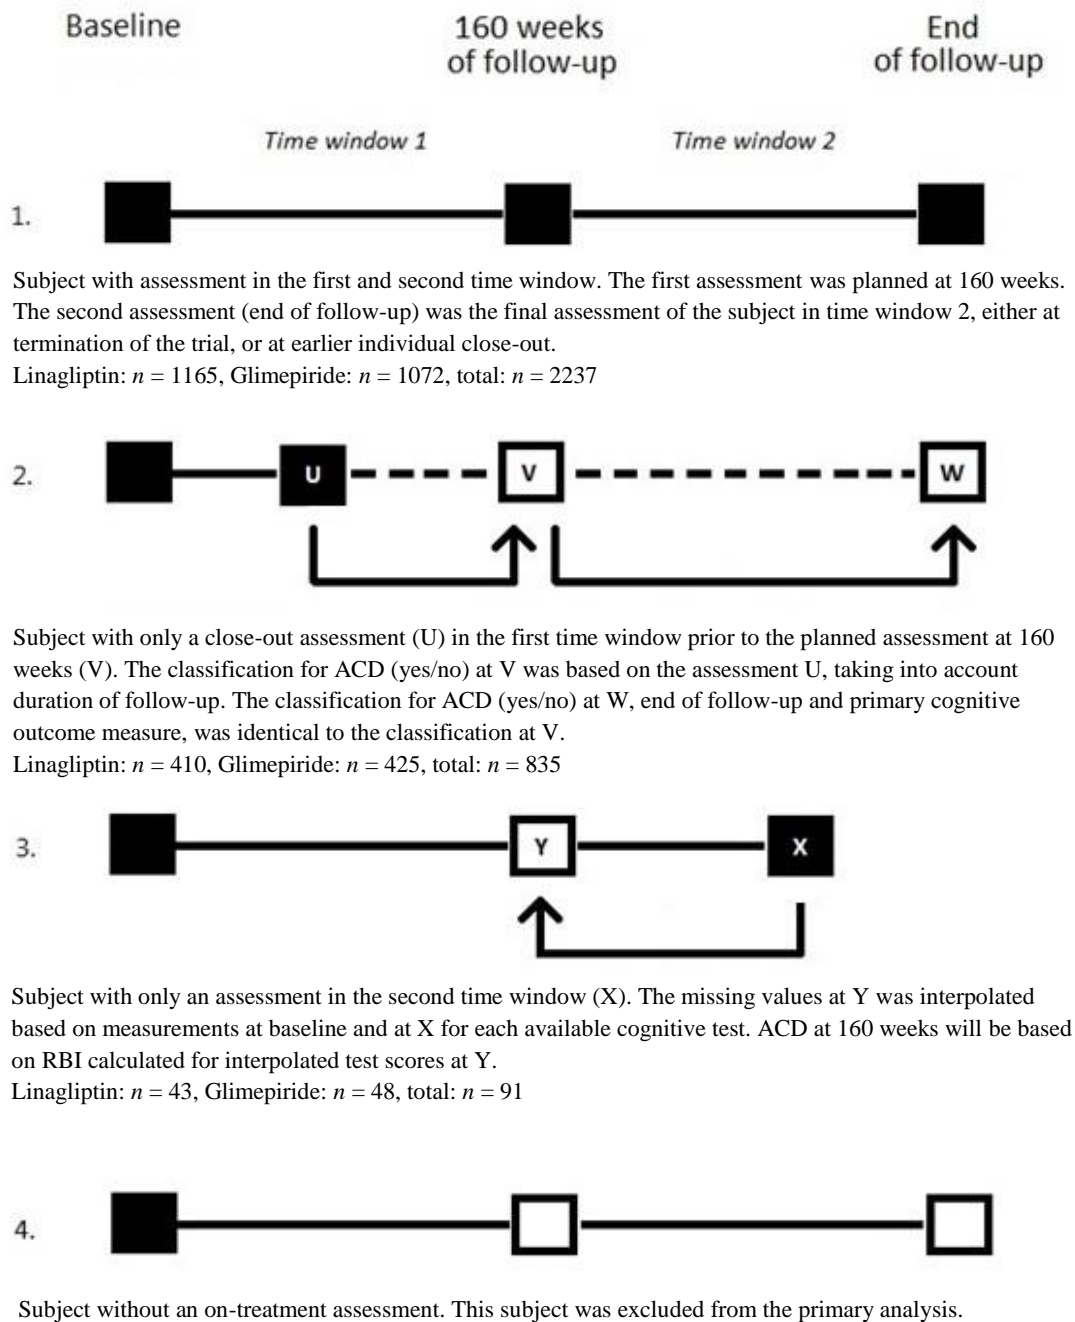

ESM Figure 2. CAROLINA-COGNITION study flow-chart.

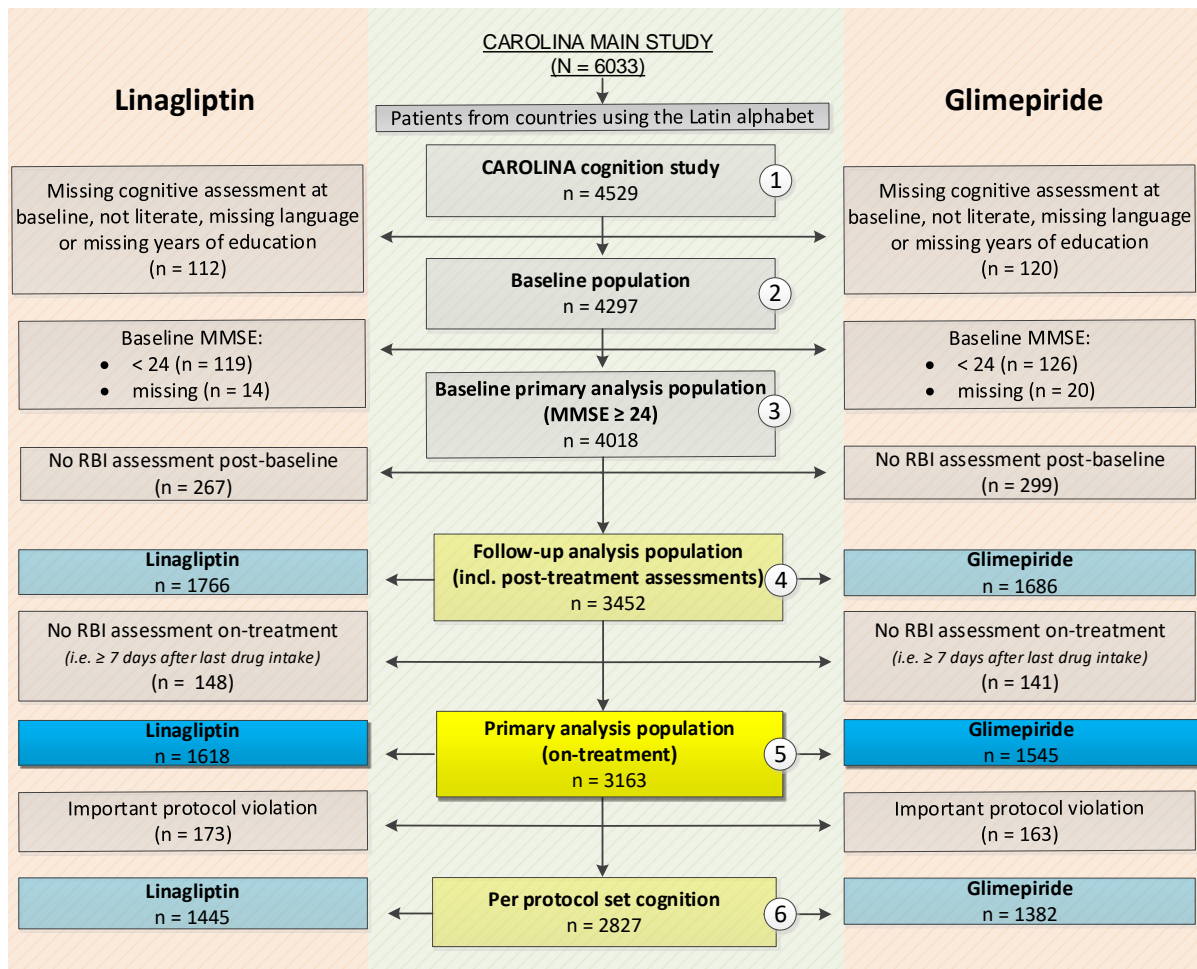

- ① Includes all participants from countries using the Latin alphabet who were dispensed study medication and were documented to have taken at least one dose of investigational treatment (treated set).
- ② Includes all participants in ① who have baseline assessment (of which at least one of the z-scores, A&E or MMSE can be calculated), are literate and their years of formal education are available (BL-COG).
- ③ All participants in ② with MMSE  $\geq 24$  at baseline. This set is used for language correction and calculation of z-scores (BL-COG-ELIG).
- ④ Includes all participants included in ③ who have at least one post-baseline assessment (on-treatment, or post-treatment, FAS-COG-EXT). Used for sensitivity analysis 5 in ESM Table 3.
- ⑤ Includes all participants included in ③ who have at least one on-treatment assessment or who had a valid baseline assessment but did not understand the test instructions at the subsequent assessment and were therefore classified as having ACD (i.e. within 7 days after treatment stop) ; this set is used for the primary analysis (FAS-COG).
- ⑥ Includes all participants in ⑤ who do not have an important protocol violation (i.e. psychiatric disease or history of alcohol/drug abuse prior to inclusion; PPS-COG). Used for sensitivity analysis 1 in ESM Table 3.

A&E: attention and executive functioning, MMSE: Mini-Mental State Examination, RBI: regression based index.



ESM Figure 3. Participating countries and number of participants per country in the CAROLINA-COGNITION study.

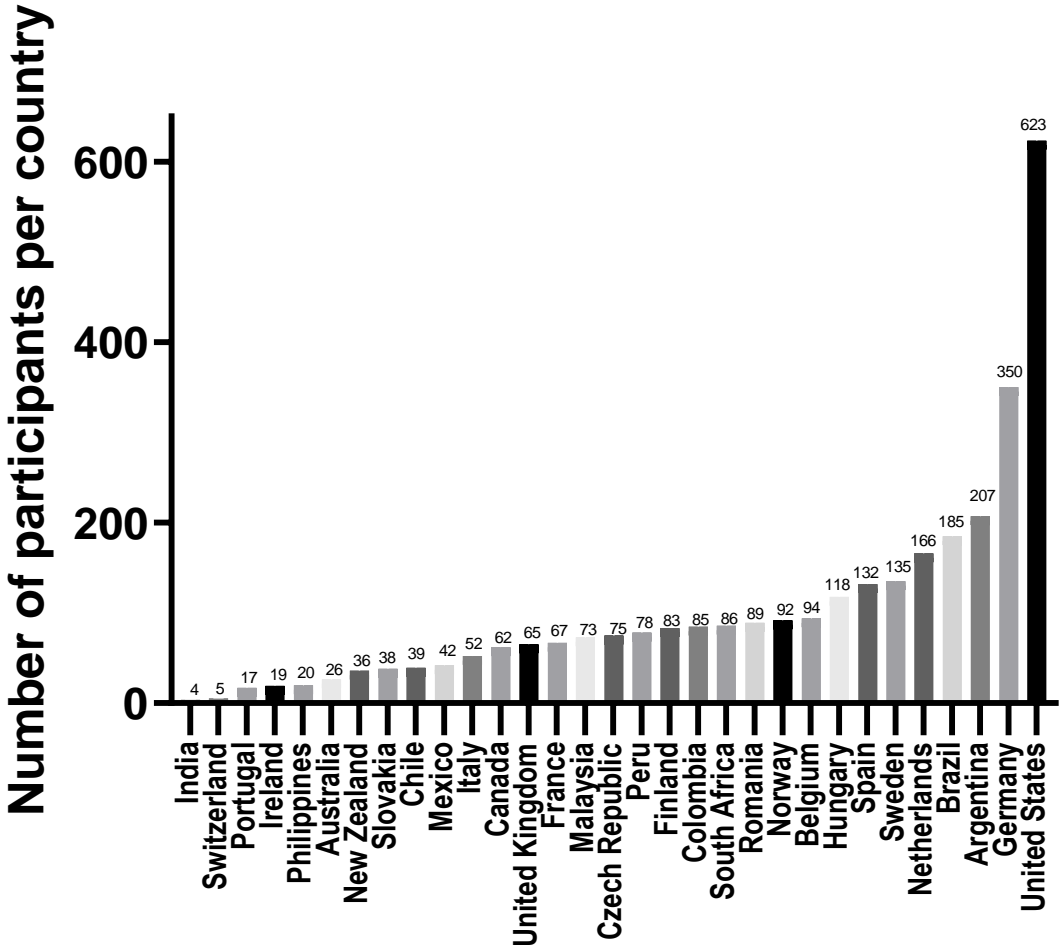

ESM figure 4. HbA1c over time in participants in the CAROLINA-COGNITION study.

A. Mmol/mol-change

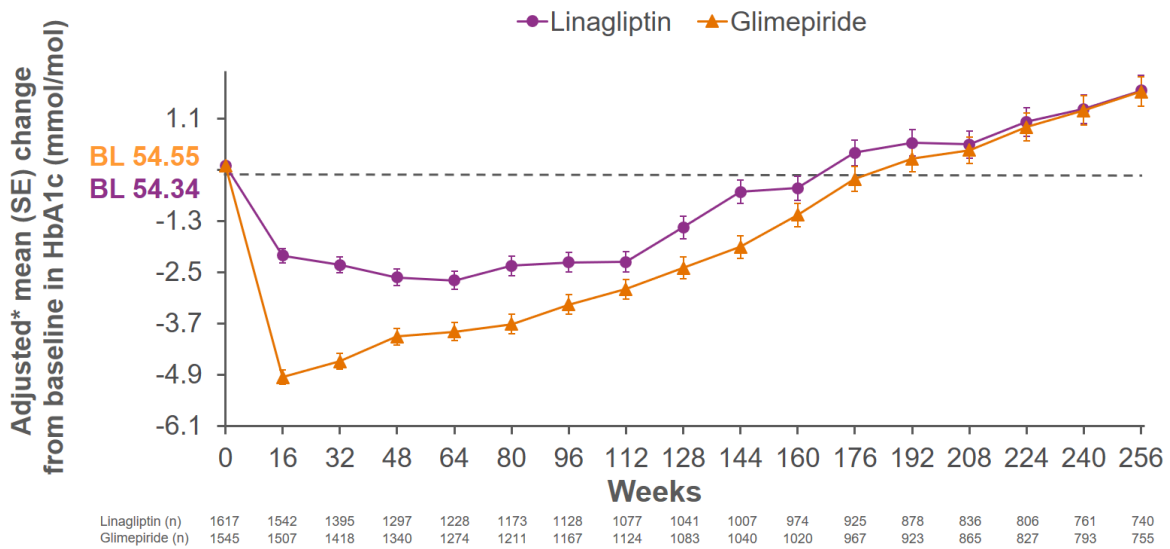

OC analysis. \*Based on MMRM including treatment, week repeated within participants, week by treatment interaction, continuous baseline HbA1c and baseline HbA1c by week interaction. BL, baseline; MMRM, mixed-model repeated measures

B. %-change

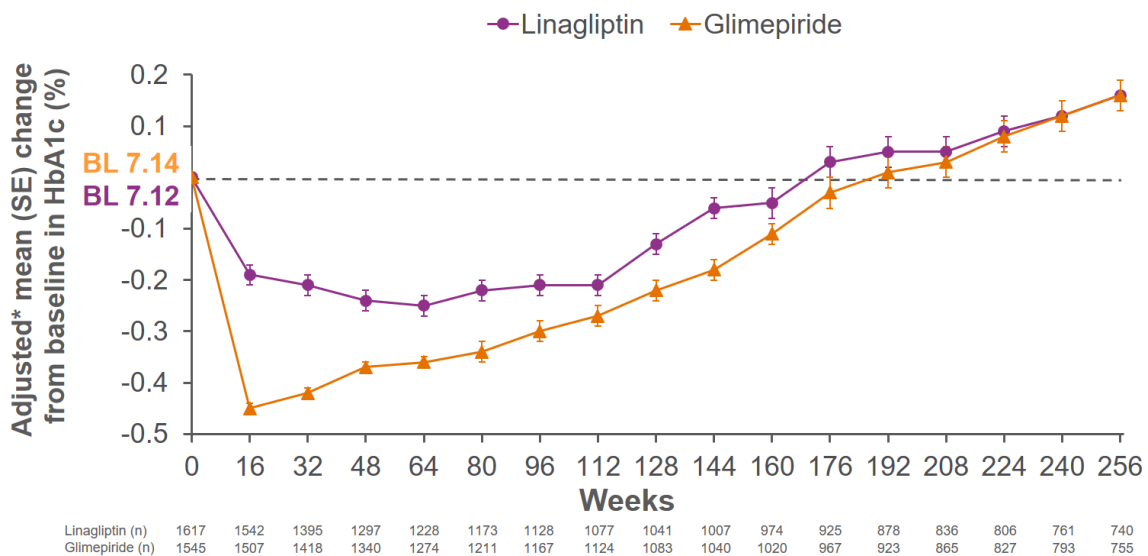

OC analysis. \*Based on MMRM including treatment, week repeated within participants, week by treatment interaction, continuous baseline HbA1c and baseline HbA1c by week interaction. BL, baseline; MMRM, mixed-model repeated measures

ESM figure 5. Weight over time in participants in the CAROLINA-COGNITION study.

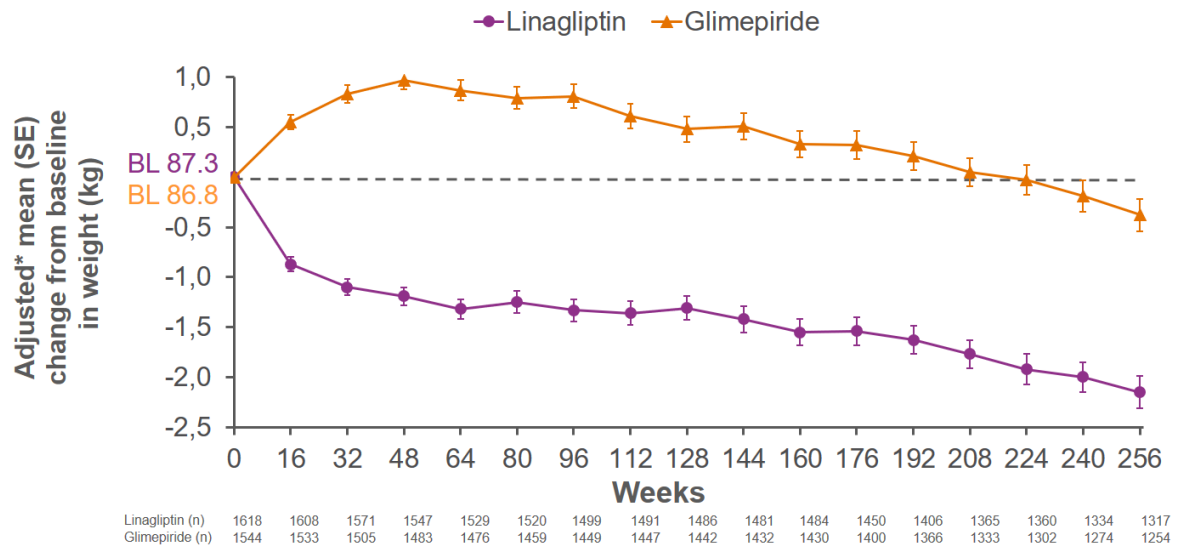

OC-ROC. \*Based on MMRM including treatment, week repeated within participants, week by treatment interaction, continuous baseline weight and baseline weight by week interaction. BL, baseline; MMRM, mixed-model repeated measures

ESM figure 6. Proportion of participants in the CAROLINA-COGNITION study with hypoglycaemia.

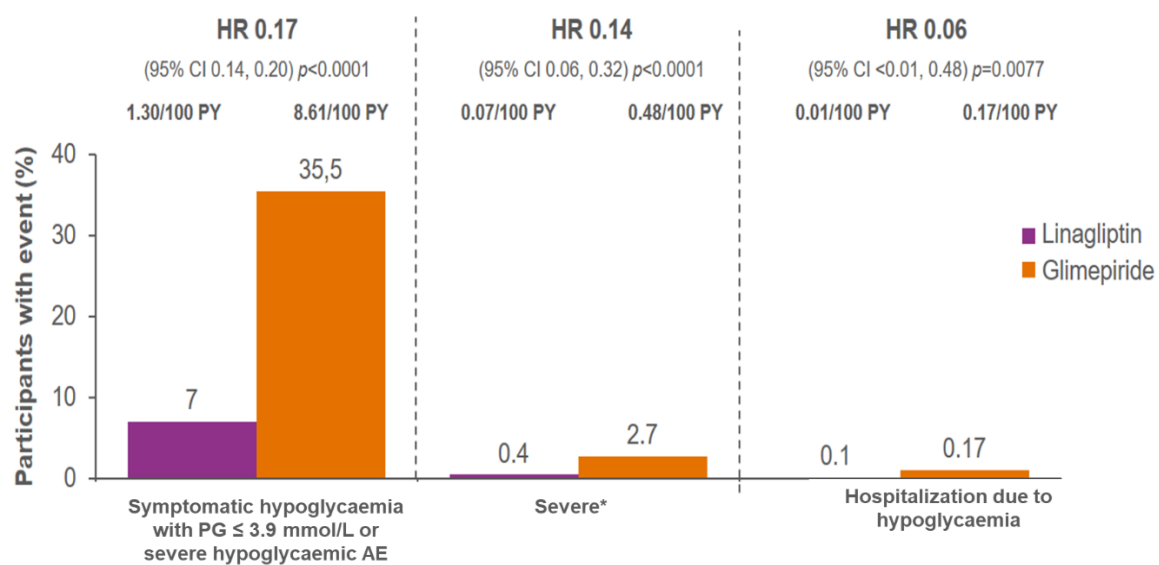

Events occurring between first study drug intake until 7 days after last permanent study drug stop. \*Hypoglycaemic event requiring the assistance of another person to actively administer carbohydrate, glucagon or other resuscitative actions. AE – adverse event.
